# Supplementary material
Source: PubMed Central journal article supplement (PMC3891683)

## **Supplemental Material to:**

**Eliezer Masliah, Wilmar Dumaop, Douglas Galasko, and  
Paula Desplats**

**Distinctive patterns of DNA methylation associated with  
Parkinson disease: Identification of concordant epigenetic  
changes in brain and peripheral blood leukocytes**

**Epigenetics 2013; 8(10)**

**<http://dx.doi.org/10.4161/epi.25865>**

**[http://www.landesbioscience.com/journals/epigenetics/  
article/25865/](http://www.landesbioscience.com/journals/epigenetics/article/25865/)**

## **Supplemental Material**

**Supplementary Table 1.** Demographic characterization of the studied cohort.

**Supplementary Table 2.** Differentially methylated autosomal genes in PD brain.

**Supplementary Table 3.** Differentially methylated autosomal genes in PD blood.

**Supplementary Table 4.** Genes showing co-variation of DNA methylation between brain and blood in PD cases.

**Supplementary Figure 1.** Bootstrap analysis of DM probes.

**Supplementary Figure 2.** Validation of array findings by methylationsensitive/qPCR.

**Supplementary Table 1-A. Clinical and demographic characteristics of the studied cohort**

| Group              | Age (y) | Gender F/ M (n) | Brain weight (g) | MMSE <sup>1</sup> | Education (yrs) |
|--------------------|---------|-----------------|------------------|-------------------|-----------------|
| <b>Control</b>     | 89 ± 4  | 4 / 2 (6)       | 1,144 ± 199      | 27.8 ± 1.3        | 15 ± 2          |
| <b>Parkinson's</b> | 80 ± 8  | 0 / 5 (5)       | 1,246 ± 104      | 15.2 ± 10         | 17 ± 3          |

1. Mini-Mental State Examination.

**Supplementary Table 1-B. Individual clinical profile and drug treatment of PD patients**

| Case ID  | First PD diagnosis | Disease Duration (y) | Drug Treatment *              | Date started on medication |
|----------|--------------------|----------------------|-------------------------------|----------------------------|
| <b>1</b> | 2004               | 7                    | Sinemet<br>Rasagiline         | 2004<br>2009               |
| <b>2</b> | 1981               | 26                   | Sinemet<br>Deprenyl<br>Comtan | 1983<br>1989<br>2000       |
| <b>3</b> | 1984               | 16                   | ENA-713                       | 1995                       |
| <b>4</b> | 1999               | 9                    | Clonazepan<br>Memantine       | 1996<br>2004               |
| <b>5</b> | 2002               | 7                    | Sinemet<br>Rivastigmine       | 2007<br>2008               |

\* Record of medication most relevant to PD pathology

**Supplementary Table 2. Autosomal genes showing differential methylation in the brain of PD cases.** Analysis of differential methylation was performed with Genome Studio using Illumina custom model. Genes with Delta  $\beta$  value  $> |0.20|$  at  $p < 0.01$  and FDR  $q < 0.001$ . \* Denotes genes for which more than one DM independent probe was detected showing opposite methylation changes.

| TargetID                                      | ACCESSION#   | GENE NAME | DiffScore | Delta Beta | CHR | CpG Context |
|-----------------------------------------------|--------------|-----------|-----------|------------|-----|-------------|
| <b>Genes with decreased methylation in PD</b> |              |           |           |            |     |             |
| cg05084668                                    | NM_001015050 | ALG1L     | -143.090  | -0.233     | 3   |             |
| cg20959002                                    | NM_133463    | AMZ1      | -159.666  | -0.241     | 7   | S_Shelf     |
| cg09785377                                    | NM_001136015 | ANXA2     | -142.532  | -0.234     | 15  |             |
| cg14460215                                    | NM_001163    | APBA1     | -243.590  | -0.312     | 9   | S_Shore     |
| cg27057480                                    | NM_021226    | ARHGAP22  | -165.823  | -0.258     | 10  | S_Shore     |
| cg10738003                                    | NM_015313    | ARHGEF12  | -229.619  | -0.301     | 11  |             |
| cg16655091                                    | NM_016529    | ATP8A2    | -137.037  | -0.244     | 13  | S_Shelf     |
| cg25165144                                    | NM_173593    | B4GALNT3  | -129.592  | -0.207     | 12  |             |
| cg05483487                                    | NM_173593    | B4GALNT3  | -115.847  | -0.205     | 12  |             |
| cg24859648                                    | NM_178477    | BANF2     | -163.008  | -0.236     | 20  |             |
| cg18861767                                    | NR_024572    | C10orf58  | -112.505  | -0.222     | 10  |             |
| cg09175792                                    | NM_199459    | C10orf71  | -171.287  | -0.201     | 10  | Island      |
| cg08085267                                    | NM_152347    | C17orf57  | -101.182  | -0.210     | 17  | S_Shore     |
| cg09385306                                    | NM_198077    | C1orf52   | -88.117   | -0.201     | 1   | N_Shore     |
| cg01784345                                    | NM_032261    | C21orf56  | -141.770  | -0.211     | 21  | N_Shore     |
| cg18457108                                    | NM_152531    | C3orf21   | -116.696  | -0.219     | 3   |             |
| cg18391209                                    | NM_001143962 | CAPN8     | -260.688  | -0.318     | 1   | S_Shelf     |
| cg10482512                                    | NM_004367    | CCR6      | -96.688   | -0.210     | 6   |             |
| cg16744961                                    | NM_172004    | CLECL1    | -136.458  | -0.244     | 12  |             |
| cg05340866                                    | NM_014141    | CNTNAP2   | -155.009  | -0.256     | 7   | N_Shelf     |
| cg14782559                                    | NM_080679    | COL11A2   | -115.460  | -0.224     | 6   | S_Shelf     |
| cg22508145                                    | NM_015692    | CPAMD8    | -161.492  | -0.252     | 19  |             |
| cg20208879                                    | NM_004389    | CTNNA2    | -209.601  | -0.270     | 2   |             |
| cg05195318                                    | NM_001037333 | CYFIP2    | -127.259  | -0.209     | 5   |             |
| cg09746326                                    | NM_001014283 | DCUN1D2   | -285.361  | -0.307     | 13  |             |
| cg14506194                                    | NR_026597    | DIRC3     | -168.849  | -0.223     | 2   |             |
| cg03327352                                    | NM_147192    | DMBX1     | -342.878  | -0.370     | 1   |             |
| cg07437923                                    | NM_001135110 | DNAJA3    | -342.878  | -0.445     | 16  |             |
| cg24407607                                    | NM_013352    | DSE       | -171.169  | -0.255     | 6   |             |
| cg17279365                                    | NM_206594    | ESRRG     | -135.385  | -0.230     | 1   |             |

|                   |              |              |          |        |    |         |
|-------------------|--------------|--------------|----------|--------|----|---------|
| <b>cg24345856</b> | NM_001014980 | FAM132A      | -162.147 | -0.232 | 1  | S_Shore |
| <b>cg09281805</b> | NM_001037165 | FOXK1        | -253.377 | -0.317 | 7  |         |
| <b>cg07525313</b> | NM_002031    | FRK          | -342.878 | -0.386 | 6  |         |
| <b>cg13291296</b> | NM_145290    | GPR125       | -306.262 | -0.308 | 4  |         |
| <b>cg11478607</b> | NM_000853    | GSTT1        | -280.913 | -0.240 | 22 | Island  |
| <b>cg01238044</b> | NM_000853    | GSTT1        | -162.218 | -0.219 | 22 | N_Shore |
| <b>cg01647917</b> | NM_005317    | GZMM         | -143.690 | -0.220 | 19 | S_Shore |
| <b>cg00211215</b> | NM_002124    | HLA-DRB1*    | -342.878 | -0.409 | 6  | Island  |
| <b>cg15568074</b> | NM_002124    | HLA-DRB1*    | -160.212 | -0.259 | 6  | Island  |
| <b>cg16514085</b> | NM_002124    | HLA-DRB1*    | -110.013 | -0.219 | 6  | Island  |
| <b>cg25046571</b> | NM_002127    | HLA-G        | -122.637 | -0.227 | 6  | N_Shore |
| <b>cg07629625</b> | NM_001105521 | JAKMIP3      | -342.878 | -0.495 | 10 |         |
| <b>cg03084184</b> | NM_001105521 | JAKMIP3      | -253.038 | -0.311 | 10 |         |
| <b>cg09518270</b> | NM_172362    | KCNH1        | -166.731 | -0.254 | 1  | S_Shore |
| <b>cg05522042</b> | NM_014732    | KIAA0513     | -160.380 | -0.259 | 16 |         |
| <b>cg22336867</b> | NM_002307    | LGALS7       | -342.878 | -0.368 | 19 | S_Shelf |
| <b>cg24730756</b> | NR_028415    | LOC100292680 | -140.498 | -0.244 | 12 |         |
| <b>cg04234412</b> | NM_001144931 | LOC391322    | -267.675 | -0.317 | 22 | Island  |
| <b>cg15083522</b> | NM_001143757 | LRRRC27      | -342.878 | -0.382 | 10 |         |
| <b>cg21829038</b> | NM_024652    | LRRK1*       | -156.769 | -0.216 | 15 | Island  |
| <b>cg12543766</b> | NM_012301    | MAGI2        | -261.794 | -0.306 | 7  | S_Shelf |
| <b>cg05093818</b> | NM_138982    | MAPK10       | -88.353  | -0.201 | 4  |         |
| <b>cg08238375</b> | NM_002387    | MCC          | -113.551 | -0.216 | 5  |         |
| <b>cg25340688</b> | NR_030583    | MIR886       | -134.531 | -0.241 | 5  | Island  |
| <b>cg26328633</b> | NR_030583    | MIR886       | -113.944 | -0.225 | 5  | Island  |
| <b>cg06536614</b> | NR_030583    | MIR886       | -94.768  | -0.206 | 5  | Island  |
| <b>cg04481923</b> | NR_030583    | MIR886       | -95.385  | -0.206 | 5  | Island  |
| <b>cg00124993</b> | NR_030583    | MIR886       | -96.393  | -0.205 | 5  | Island  |
| <b>cg18678645</b> | NR_030583    | MIR886       | -92.209  | -0.202 | 5  | Island  |
| <b>cg19712277</b> | NM_033467    | MMEL1*       | -190.273 | -0.226 | 1  | Island  |
| <b>cg04528326</b> | NM_007208    | MRPL3        | -127.621 | -0.221 | 3  | N_Shelf |
| <b>cg00295418</b> | NM_003970    | MYOM2        | -146.225 | -0.249 | 8  |         |
| <b>cg05891136</b> | NM_003970    | MYOM2        | -97.240  | -0.206 | 8  |         |
| <b>cg05023192</b> | NM_004544    | NDUFA10      | -126.818 | -0.229 | 2  | S_Shore |
| <b>cg15075357</b> | NM_015102    | NPHP4        | -137.161 | -0.245 | 1  |         |
| <b>cg04152793</b> | NM_001144059 | NTM          | -127.991 | -0.223 | 11 |         |
| <b>cg11881038</b> | NM_001145283 | OPRM1        | -262.959 | -0.318 | 6  |         |
| <b>cg01463139</b> | NM_001004473 | OR10K1       | -106.787 | -0.219 | 1  |         |
| <b>cg16035267</b> | NM_030959    | OR12D3       | -237.267 | -0.280 | 6  |         |
| <b>cg00045070</b> | NM_174936    | PCSK9        | -129.340 | -0.238 | 1  | N_Shore |

|                                                      |              |           |          |        |    |         |
|------------------------------------------------------|--------------|-----------|----------|--------|----|---------|
| <b>cg11594160</b>                                    | NM_005027    | PIK3R2    | -162.084 | -0.229 | 19 | S_Shore |
| <b>cg06012903</b>                                    | NM_002847    | PTPRN2    | -123.859 | -0.223 | 7  | S_Shore |
| <b>cg23657215</b>                                    | NM_138499    | PWWP2B    | -110.682 | -0.222 | 10 | S_Shore |
| <b>cg18443741</b>                                    | NM_024854    | PYROXD1   | -122.462 | -0.232 | 12 | S_Shelf |
| <b>cg11508056</b>                                    | NM_019034    | RHOF      | -118.393 | -0.211 | 12 |         |
| <b>cg27308738</b>                                    | NM_014631    | SH3PXD2A  | -133.025 | -0.236 | 10 | N_Shelf |
| <b>cg16733676</b>                                    | NM_213651    | SLC25A24  | -182.809 | -0.253 | 1  | N_Shore |
| <b>cg22841866</b>                                    | NM_133489    | SLC26A10  | -91.812  | -0.202 | 12 | Island  |
| <b>cg05509228</b>                                    | NM_022138    | SMOC2     | -144.912 | -0.222 | 6  | Island  |
| <b>cg04798314</b>                                    | NM_001167740 | SMYD3     | -98.302  | -0.208 | 1  | N_Shore |
| <b>cg17174466</b>                                    | NM_001100422 | SPATS2L   | -125.633 | -0.217 | 2  |         |
| <b>cg17671604</b>                                    | NM_020971    | SPTBN4    | -135.959 | -0.242 | 19 | N_Shelf |
| <b>cg00030117</b>                                    | NM_001008410 | STEAP3    | -342.878 | -0.358 | 2  | N_Shore |
| <b>cg16956665</b>                                    | NM_152713    | STT3A     | -159.901 | -0.258 | 11 |         |
| <b>cg17386240</b>                                    | NM_000358    | TGFBI     | -162.268 | -0.256 | 5  |         |
| <b>cg20926353</b>                                    | NM_005077    | TLE1      | -118.007 | -0.207 | 9  | Island  |
| <b>cg07876831</b>                                    | NM_017905    | TMCO3     | -126.706 | -0.207 | 13 | N_Shelf |
| <b>cg14361804</b>                                    | NM_001244    | TNFSF8    | -118.296 | -0.230 | 9  |         |
| <b>cg24697433</b>                                    | NM_006510    | TRIM27    | -103.339 | -0.210 | 6  |         |
| <b>cg20089799</b>                                    | NM_006675    | TSPAN9    | -148.536 | -0.253 | 12 |         |
| <b>cg03206401</b>                                    | NM_207312    | TUBA3E    | -96.370  | -0.210 | 2  | Island  |
| <b>cg20106077</b>                                    | NM_182552    | WDR27     | -150.634 | -0.219 | 6  | N_Shore |
| <b>cg02823311</b>                                    | NM_020196    | XAB2      | -177.112 | -0.234 | 19 | Island  |
| <b>cg03900028</b>                                    | NM_015852    | ZNF117    | -177.587 | -0.273 | 7  |         |
| <b><i>Genes with increased methylation in PD</i></b> |              |           |          |        |    |         |
| <b>cg10760240</b>                                    | NM_012138    | AATF      | 342.878  | 0.224  | 17 |         |
| <b>cg01491428</b>                                    | NM_001089    | ABCA3     | 342.878  | 0.264  | 16 | Island  |
| <b>cg09998151</b>                                    | NM_004274    | AKAP6     | 103.863  | 0.216  | 14 |         |
| <b>cg05890457</b>                                    | NM_014629    | ARHGEF10  | 342.878  | 0.319  | 8  |         |
| <b>cg24166916</b>                                    | NM_000046    | ARSB      | 342.878  | 0.220  | 5  | S_Shore |
| <b>cg17056069</b>                                    | NM_001135191 | ASAP2     | 342.878  | 0.235  | 2  |         |
| <b>cg00095677</b>                                    | NM_174954    | ATP2A3    | 342.878  | 0.235  | 17 |         |
| <b>cg00713204</b>                                    | NM_017869    | BANP      | 342.878  | 0.254  | 16 | N_Shore |
| <b>cg14655569</b>                                    | NM_015250    | BICD2     | 342.878  | 0.266  | 9  | N_Shelf |
| <b>cg00231519</b>                                    | NM_153810    | C10orf46  | 119.059  | 0.223  | 10 | S_Shore |
| <b>cg16706502</b>                                    | NM_080664    | C14orf126 | 342.878  | 0.298  | 14 | S_Shore |
| <b>cg23813394</b>                                    | NM_004369    | COL6A3    | 127.621  | 0.236  | 2  |         |
| <b>cg16471877</b>                                    | NM_017421    | COQ3      | 118.170  | 0.219  | 6  |         |
| <b>cg11128983</b>                                    | NM_001008220 | CPLX2     | 131.466  | 0.200  | 5  | N_Shore |
| <b>cg00861214</b>                                    | NM_175710    | CR1L      | 342.878  | 0.244  | 1  |         |

|                   |              |           |         |       |    |         |
|-------------------|--------------|-----------|---------|-------|----|---------|
| <b>cg11229715</b> | NM_003590    | CUL3      | 94.918  | 0.209 | 2  |         |
| <b>cg08002427</b> | NM_001372    | DNAH9     | 114.432 | 0.220 | 17 | S_Shore |
| <b>cg04212500</b> | NM_005702    | ERAL1     | 342.878 | 0.237 | 17 | S_Shelf |
| <b>cg09438069</b> | NM_005245    | FAT1      | 113.270 | 0.214 | 4  |         |
| <b>cg04888234</b> | NM_032738    | FCRLA     | 99.076  | 0.210 | 1  |         |
| <b>cg16140565</b> | NM_001166243 | FHIT      | 342.878 | 0.254 | 3  |         |
| <b>cg01801090</b> | NR_029435    | FLJ31306  | 342.878 | 0.240 | 14 | N_Shelf |
| <b>cg25203245</b> | NM_152432    | FLJ32810  | 342.878 | 0.316 | 11 |         |
| <b>cg10058204</b> | NR_026835    | FLJ37201  | 342.878 | 0.254 | 10 |         |
| <b>cg03812172</b> | NM_033508    | GCK       | 129.769 | 0.223 | 7  | N_Shore |
| <b>cg02891314</b> | NM_005110    | GFPT2     | 342.878 | 0.316 | 5  | Island  |
| <b>cg13944838</b> | NM_005110    | GFPT2     | 342.878 | 0.263 | 5  | Island  |
| <b>cg23221052</b> | NM_005110    | GFPT2     | 342.878 | 0.279 | 5  | Island  |
| <b>cg23248424</b> | NM_005110    | GFPT2     | 342.878 | 0.308 | 5  | Island  |
| <b>cg15242686</b> | NR_003081    | GSTTP1    | 108.769 | 0.218 | 22 |         |
| <b>cg01500431</b> | NR_003082    | GSTTP2    | 342.878 | 0.222 | 22 | S_Shelf |
| <b>cg09510698</b> | NR_001435    | HLA-DPB2  | 342.878 | 0.272 | 6  |         |
| <b>cg24470466</b> | NM_002122    | HLA-DQA1  | 342.878 | 0.437 | 6  |         |
| <b>cg24969496</b> | NM_002122    | HLA-DQA1  | 102.246 | 0.213 | 6  |         |
| <b>cg08964730</b> | NM_002123    | HLA-DQB1  | 342.878 | 0.223 | 6  | S_Shore |
| <b>cg12867728</b> | NM_002124    | HLA-DRB1* | 110.059 | 0.222 | 6  | N_Shelf |
| <b>cg13910785</b> | NM_002124    | HLA-DRB1* | 342.878 | 0.350 | 6  | N_Shelf |
| <b>cg21810411</b> | NM_002124    | HLA-DRB1* | 120.061 | 0.223 | 6  | N_Shelf |
| <b>cg24760581</b> | NM_002124    | HLA-DRB1* | 117.666 | 0.224 | 6  |         |
| <b>cg26590106</b> | NM_002124    | HLA-DRB1* | 342.878 | 0.263 | 6  | N_Shelf |
| <b>cg01341801</b> | NM_002125    | HLA-DRB5  | 342.878 | 0.271 | 6  | N_Shore |
| <b>cg17369694</b> | NM_002125    | HLA-DRB5  | 342.878 | 0.231 | 6  |         |
| <b>cg18111114</b> | NM_002125    | HLA-DRB5  | 342.878 | 0.343 | 6  |         |
| <b>cg11752699</b> | NR_001298    | HLA-DRB6  | 98.266  | 0.207 | 6  |         |
| <b>cg22627029</b> | NR_001298    | HLA-DRB6  | 134.390 | 0.231 | 6  |         |
| <b>cg25140213</b> | NR_001298    | HLA-DRB6  | 342.878 | 0.284 | 6  |         |
| <b>cg03648908</b> | NM_002222    | ITPR1     | 92.341  | 0.205 | 3  |         |
| <b>cg03796003</b> | NM_018992    | KCTD5     | 342.878 | 0.429 | 16 | Island  |
| <b>cg00729708</b> | NM_178842    | LASS3     | 119.661 | 0.230 | 15 | Island  |
| <b>cg10879348</b> | NM_004987    | LIMS1     | 117.005 | 0.211 | 2  |         |
| <b>cg11008123</b> | NR_015451    | LOC283267 | 342.878 | 0.375 | 11 |         |
| <b>cg25450321</b> | NM_024652    | LRRK1*    | 342.878 | 0.294 | 15 | N_Shelf |
| <b>cg13275129</b> | NM_032427    | MAML2     | 119.788 | 0.204 | 11 |         |
| <b>cg02228913</b> | NM_016835    | MAPT      | 342.878 | 0.238 | 17 | N_Shelf |
| <b>cg24801230</b> | NM_001123067 | MAPT      | 342.878 | 0.249 | 17 | S_Shelf |

|                   |              |          |         |       |    |         |
|-------------------|--------------|----------|---------|-------|----|---------|
| <b>cg21209485</b> | NM_033467    | MMEL1*   | 342.878 | 0.284 | 1  | S_Shore |
| <b>cg04627110</b> | NM_206813    | MOG      | 342.878 | 0.357 | 6  |         |
| <b>cg12279734</b> | NM_006792    | MORF4    | 342.878 | 0.226 | 4  |         |
| <b>cg25755428</b> | NM_001031727 | MRI1     | 342.878 | 0.258 | 19 | Island  |
| <b>cg18346634</b> | NM_000911    | OPRD1    | 342.878 | 0.263 | 1  | S_Shore |
| <b>cg10701801</b> | NM_148909    | OSBPL9   | 105.855 | 0.213 | 1  |         |
| <b>cg21069494</b> | NM_002626    | PFKL     | 129.769 | 0.223 | 21 | S_Shelf |
| <b>cg26584456</b> | NM_005729    | PPIF     | 342.878 | 0.298 | 10 |         |
| <b>cg08600378</b> | NM_001105577 | PRHOXNB  | 342.878 | 0.340 | 13 |         |
| <b>cg02978201</b> | NM_002761    | PRM1     | 114.901 | 0.222 | 16 |         |
| <b>cg02901522</b> | NR_003367    | PVT1     | 134.390 | 0.241 | 8  |         |
| <b>cg12532878</b> | NM_007368    | RASA3    | 94.839  | 0.206 | 13 | N_Shore |
| <b>cg03570263</b> | NM_170769    | RNF39    | 115.872 | 0.218 | 6  | S_Shore |
| <b>cg13251750</b> | NM_175739    | SERPINA9 | 86.518  | 0.201 | 14 |         |
| <b>cg19223824</b> | NM_020708    | SLC12A5  | 342.878 | 0.284 | 20 | N_Shelf |
| <b>cg17662493</b> | NM_148674    | SMC1B    | 342.878 | 0.273 | 22 | N_Shelf |
| <b>cg09050820</b> | NM_001145121 | TCP10L2  | 104.445 | 0.209 | 6  | N_Shore |
| <b>cg15290312</b> | NM_003255    | TIMP2    | 125.152 | 0.225 | 17 | Island  |
| <b>cg01012836</b> | NM_052907    | TMEM132B | 105.780 | 0.208 | 12 |         |
| <b>cg16112880</b> | NM_016456    | TMEM9    | 342.878 | 0.274 | 1  | Island  |
| <b>cg26365090</b> | NM_001098796 | TOX2     | 128.553 | 0.232 | 20 |         |
| <b>cg02627240</b> | NM_022445    | TPK1     | 342.878 | 0.239 | 7  |         |
| <b>cg03422583</b> | NM_025204    | TRABD    | 118.352 | 0.203 | 22 | N_Shore |
| <b>cg03187614</b> | NM_006778    | TRIM10   | 342.878 | 0.352 | 6  |         |
| <b>cg25569462</b> | NM_173553    | TRIML2   | 107.227 | 0.208 | 4  | N_Shore |
| <b>cg01891583</b> | NM_003470    | USP7     | 87.287  | 0.201 | 16 |         |
| <b>cg15365500</b> | NM_005715    | UST      | 342.878 | 0.272 | 6  |         |
| <b>cg13564529</b> | NM_001134398 | VAV2     | 342.878 | 0.374 | 9  |         |
| <b>cg15625495</b> | NM_005997    | VPS72    | 342.878 | 0.245 | 1  |         |
| <b>cg07456585</b> | NM_182894    | VSX2     | 134.390 | 0.240 | 14 | N_Shore |
| <b>cg21171335</b> | NM_144668    | WDR66    | 342.878 | 0.238 | 12 | Island  |
| <b>cg22618164</b> | NM_144668    | WDR66    | 110.475 | 0.203 | 12 | Island  |
| <b>cg19471911</b> | NM_001130145 | YAP1     | 91.716  | 0.206 | 11 |         |
| <b>cg07878625</b> | NR_015357    | ZNF783   | 342.878 | 0.213 | 7  | N_Shore |



**Supplementary Table 3. Autosomal genes showing differential methylation on PBLs from PD cases.** Analysis of differential methylation was performed with Genome Studio using Illumina custom model. Genes with Delta  $\beta$  value  $> |0.20|$  at  $p < 0.01$  and FDR  $q < 0.001$ . \* Denotes genes for which more than one DM independent probe was detected showing opposite methylation changes.

| TargetID                                      | ACCESSION#   | GENE NAME | DiffScore | Delta Beta | CHR | CpG Context |
|-----------------------------------------------|--------------|-----------|-----------|------------|-----|-------------|
| <b>Genes with decreased methylation in PD</b> |              |           |           |            |     |             |
| cg06131755                                    | NM_005891    | ACAT2     | -135.396  | -0.206     | 6   | Island      |
| cg25736982                                    | NM_005891    | ACAT2     | -115.981  | -0.201     | 6   | Island      |
| cg20959002                                    | NM_133463    | AMZ1      | -178.400  | -0.253     | 7   | S_Shelf     |
| cg09785377                                    | NM_001136015 | ANXA2     | -156.458  | -0.244     | 15  |             |
| cg14460215                                    | NM_001163    | APBA1     | -195.225  | -0.283     | 9   | S_Shore     |
| cg10738003                                    | NM_015313    | ARHGEF12  | -226.177  | -0.300     | 11  |             |
| cg16655091                                    | NM_016529    | ATP8A2    | -110.950  | -0.221     | 13  | S_Shelf     |
| cg24859648                                    | NM_178477    | BANF2     | -274.720  | -0.291     | 20  |             |
| cg08253809                                    | NM_017924    | C14orf119 | -116.598  | -0.227     | 14  | S_Shelf     |
| cg13966843                                    | NM_006781    | C6orf10   | -173.991  | -0.220     | 6   |             |
| cg18391209                                    | NM_001143962 | CAPN8     | -234.488  | -0.305     | 1   | S_Shelf     |
| cg11070193                                    | NM_198137    | CATSPER4  | -97.137   | -0.207     | 1   |             |
| cg20415053                                    | NM_198137    | CATSPER4  | -117.531  | -0.226     | 1   |             |
| cg04246708                                    | NM_001139459 | CNST      | -213.902  | -0.294     | 1   | S_Shore     |
| cg05340866                                    | NM_014141    | CNTNAP2   | -164.915  | -0.261     | 7   | N_Shelf     |
| cg14782559                                    | NM_080679    | COL11A2   | -97.924   | -0.209     | 6   | S_Shelf     |
| cg22508145                                    | NM_015692    | CPAMD8    | -146.686  | -0.245     | 19  |             |
| cg05092371                                    | NM_001037631 | CTLA4     | -112.911  | -0.201     | 2   |             |
| cg20208879                                    | NM_004389    | CTNNA2    | -149.883  | -0.234     | 2   |             |
| cg09746326                                    | NM_001014283 | DCUN1D2   | -329.196  | -0.305     | 13  |             |
| cg25709790                                    | NM_001127454 | DFNA5     | -139.792  | -0.229     | 7   |             |
| cg24068006                                    | NM_014974    | DIP2C     | -142.297  | -0.209     | 10  | S_Shore     |
| cg03327352                                    | NM_147192    | DMBX1     | -333.136  | -0.354     | 1   |             |
| cg07437923                                    | NM_001135110 | DNAJA3    | -344.873  | -0.511     | 16  |             |
| cg24407607                                    | NM_013352    | DSE;DSE   | -181.425  | -0.259     | 6   |             |
| cg22459517                                    | NM_133180    | EPS8L1    | -109.244  | -0.218     | 19  |             |
| cg24345856                                    | NM_001014980 | FAM132A   | -119.584  | -0.207     | 1   | S_Shore     |
| cg00167275                                    | NM_019054    | FAM35A    | -161.156  | -0.205     | 10  | Island      |
| cg21190982                                    | NM_015962    | FCF1      | -104.844  | -0.217     | 14  | S_Shore     |
| cg01620164                                    | NM_018086    | FIGN      | -111.409  | -0.221     | 2   | N_Shelf     |

|                   |              |              |          |        |    |         |
|-------------------|--------------|--------------|----------|--------|----|---------|
| <b>cg09281805</b> | NM_001037165 | FOXK1        | -301.844 | -0.340 | 7  |         |
| <b>cg07525313</b> | NM_002031    | FRK          | -304.474 | -0.341 | 6  |         |
| <b>cg26303777</b> | NM_004481    | GALNT2       | -149.005 | -0.240 | 1  |         |
| <b>cg02981003</b> | NM_001083909 | GPR123       | -142.339 | -0.211 | 10 | N_Shore |
| <b>cg01238044</b> | NM_000853    | GSTT1        | -227.818 | -0.268 | 22 | N_Shore |
| <b>cg11478607</b> | NM_000853    | GSTT1        | -154.384 | -0.210 | 22 | Island  |
| <b>cg01647917</b> | NM_005317    | GZMM         | -157.727 | -0.233 | 19 | S_Shore |
| <b>cg06071033</b> | NM_005477    | HCN4         | -87.429  | -0.200 | 15 | S_Shore |
| <b>cg05341252</b> | NM_002123    | HLA-DQB1*    | -160.031 | -0.251 | 6  | Island  |
| <b>cg13423887</b> | NM_002123    | HLA-DQB1*    | -235.455 | -0.302 | 6  | Island  |
| <b>cg00211215</b> | NM_002124    | HLA-DRB1*    | -344.873 | -0.438 | 6  | Island  |
| <b>cg09139047</b> | NM_002124    | HLA-DRB1*    | -150.066 | -0.211 | 6  | Island  |
| <b>cg09949906</b> | NM_002124    | HLA-DRB1*    | -99.879  | -0.211 | 6  | S_Shore |
| <b>cg11404906</b> | NM_002124    | HLA-DRB1*    | -322.447 | -0.345 | 6  | N_Shore |
| <b>cg15568074</b> | NM_002124    | HLA-DRB1*    | -100.602 | -0.208 | 6  | Island  |
| <b>cg16514085</b> | NM_002124    | HLA-DRB1*    | -335.781 | -0.351 | 6  | Island  |
| <b>cg06316104</b> | NM_002127    | HLA-G        | -116.038 | -0.211 | 6  | S_Shore |
| <b>cg25046571</b> | NM_002127    | HLA-G        | -125.877 | -0.229 | 6  | N_Shore |
| <b>cg02856402</b> | NM_001127205 | HMOX2        | -344.873 | -0.493 | 16 |         |
| <b>cg03084184</b> | NM_001105521 | JAKMIP3      | -189.470 | -0.276 | 10 |         |
| <b>cg07629625</b> | NM_001105521 | JAKMIP3      | -344.873 | -0.449 | 10 |         |
| <b>cg09518270</b> | NM_172362    | KCNH1        | -193.384 | -0.267 | 1  | S_Shore |
| <b>cg05522042</b> | NM_014732    | KIAA0513     | -207.146 | -0.283 | 16 |         |
| <b>cg10909185</b> | NM_001039548 | KLHL35       | -130.201 | -0.231 | 11 | Island  |
| <b>cg22336867</b> | NM_002307    | LGALS7       | -344.873 | -0.380 | 19 | S_Shelf |
| <b>cg24730756</b> | NR_028415    | LOC100292680 | -242.560 | -0.288 | 12 |         |
| <b>cg11716267</b> | NM_001145710 | LOC375190    | -111.143 | -0.213 | 2  |         |
| <b>cg04234412</b> | NM_001144931 | LOC391322    | -297.451 | -0.328 | 22 | Island  |
| <b>cg04824771</b> | NM_001144931 | LOC391322    | -159.389 | -0.200 | 22 | Island  |
| <b>cg15083522</b> | NM_001143757 | LRRC27       | -344.873 | -0.406 | 10 |         |
| <b>cg21829038</b> | NM_024652    | LRRK1*       | -318.922 | -0.305 | 15 | Island  |
| <b>cg12543766</b> | NM_012301    | MAGI2        | -121.104 | -0.228 | 7  | S_Shelf |
| <b>cg12252547</b> | NM_052886    | MAL2         | -132.265 | -0.237 | 8  | N_Shore |
| <b>cg05093818</b> | NM_138982    | MAPK10       | -88.256  | -0.201 | 4  |         |
| <b>cg08238375</b> | NM_002387    | MCC          | -110.904 | -0.209 | 5  |         |
| <b>cg00124993</b> | NR_030583    | MIR886       | -170.540 | -0.254 | 5  | Island  |
| <b>cg04481923</b> | NR_030583    | MIR886       | -145.842 | -0.241 | 5  | Island  |
| <b>cg06536614</b> | NR_030583    | MIR886       | -203.039 | -0.281 | 5  | Island  |
| <b>cg08745965</b> | NR_030583    | MIR886       | -103.105 | -0.202 | 5  | S_Shore |
| <b>cg16615357</b> | NR_030583    | MIR886       | -87.763  | -0.201 | 5  | S_Shore |

|                   |              |          |          |        |    |         |
|-------------------|--------------|----------|----------|--------|----|---------|
| <b>cg18797653</b> | NR_030583    | MIR886   | -97.781  | -0.208 | 5  | S_Shore |
| <b>cg25340688</b> | NR_030583    | MIR886   | -186.941 | -0.272 | 5  | Island  |
| <b>cg26328633</b> | NR_030583    | MIR886   | -198.858 | -0.282 | 5  | Island  |
| <b>cg26896946</b> | NR_030583    | MIR886   | -130.947 | -0.234 | 5  | Island  |
| <b>cg19712277</b> | NM_033467    | MMEL1    | -155.590 | -0.220 | 1  | Island  |
| <b>cg04528326</b> | NM_007208    | MRPL3    | -119.455 | -0.214 | 3  | N_Shelf |
| <b>cg17959722</b> | NM_032477    | MRPL41   | -113.051 | -0.204 | 9  | Island  |
| <b>cg05891136</b> | NM_003970    | MYOM2    | -92.312  | -0.201 | 8  |         |
| <b>cg11132120</b> | NM_006312    | NCOR2    | -166.066 | -0.209 | 12 | N_Shelf |
| <b>cg05023192</b> | NM_004544    | NDUFA10  | -116.007 | -0.222 | 2  | S_Shore |
| <b>cg23174406</b> | NM_152905    | NEDD1    | -146.140 | -0.250 | 12 | S_Shelf |
| <b>cg11787167</b> | NM_001164749 | NPAS3    | -129.550 | -0.222 | 14 | S_Shelf |
| <b>cg15075357</b> | NM_015102    | NPHP4    | -147.520 | -0.251 | 1  |         |
| <b>cg04152793</b> | NM_001144059 | NTM      | -111.433 | -0.219 | 11 |         |
| <b>cg11881038</b> | NM_001145283 | OPRM1    | -188.558 | -0.278 | 6  |         |
| <b>cg01463139</b> | NM_001004473 | OR10K1   | -122.955 | -0.232 | 1  |         |
| <b>cg16035267</b> | NM_030959    | OR12D3*  | -229.789 | -0.275 | 6  |         |
| <b>cg10155537</b> | NM_001001918 | OR14C36  | -95.906  | -0.207 | 1  |         |
| <b>cg00045070</b> | NM_174936    | PCSK9    | -121.196 | -0.230 | 1  | N_Shore |
| <b>cg11594160</b> | NM_005027    | PIK3R2   | -189.222 | -0.223 | 19 | S_Shore |
| <b>cg07586008</b> | NM_003660    | PPFIA3   | -109.005 | -0.208 | 19 | Island  |
| <b>cg23256579</b> | NM_007244    | PRR4     | -96.265  | -0.206 | 12 |         |
| <b>cg23657215</b> | NM_138499    | PWWP2B   | -176.470 | -0.271 | 10 | S_Shore |
| <b>cg18443741</b> | NM_024854    | PYROXD1  | -196.842 | -0.283 | 12 | S_Shelf |
| <b>cg05338731</b> | NM_004914    | RAB36    | -105.430 | -0.216 | 22 | S_Shore |
| <b>cg27308738</b> | NM_014631    | SH3PXD2A | -97.766  | -0.208 | 10 | N_Shelf |
| <b>cg17221813</b> | NM_022082    | SLC17A9  | -148.649 | -0.247 | 20 | Island  |
| <b>cg19142181</b> | NM_022082    | SLC17A9  | -180.217 | -0.265 | 20 | Island  |
| <b>cg16733676</b> | NM_213651    | SLC25A24 | -179.869 | -0.241 | 1  | N_Shore |
| <b>cg05509228</b> | NM_022138    | SMOC2    | -199.613 | -0.246 | 6  | Island  |
| <b>cg04798314</b> | NM_001167740 | SMYD3    | -170.227 | -0.267 | 1  | N_Shore |
| <b>cg17174466</b> | NM_001100422 | SPATS2L  | -189.912 | -0.264 | 2  |         |
| <b>cg00030117</b> | NM_001008410 | STEAP3   | -254.295 | -0.296 | 2  | N_Shore |
| <b>cg16956665</b> | NM_152713    | STT3A    | -187.954 | -0.261 | 11 |         |
| <b>cg07876831</b> | NM_017905    | TMCO3    | -129.282 | -0.203 | 13 | N_Shelf |
| <b>cg14361804</b> | NM_001244    | TNFSF8   | -109.856 | -0.221 | 9  |         |
| <b>cg10985055</b> | NM_003449    | TRIM26   | -110.021 | -0.219 | 6  |         |
| <b>cg24697433</b> | NM_006510    | TRIM27   | -131.567 | -0.217 | 6  |         |
| <b>cg21610927</b> | NM_007118    | TRIO     | -110.257 | -0.201 | 5  |         |
| <b>cg20089799</b> | NM_006675    | TSPAN9   | -298.950 | -0.330 | 12 |         |

|                                                      |              |           |          |        |    |         |
|------------------------------------------------------|--------------|-----------|----------|--------|----|---------|
| <b>cg03206401</b>                                    | NM_207312    | TUBA3E    | -97.540  | -0.210 | 2  | Island  |
| <b>cg14417873</b>                                    | NM_001134398 | VAV2*     | -103.469 | -0.205 | 9  |         |
| <b>cg20106077</b>                                    | NM_182552    | WDR27     | -161.272 | -0.225 | 6  | N_Shore |
| <b>cg02823311</b>                                    | NM_020196    | XAB2      | -171.766 | -0.230 | 19 | Island  |
| <b>cg03900028</b>                                    | NM_015852    | ZNF117    | -233.084 | -0.305 | 7  |         |
| <b><i>Genes with increased methylation in PD</i></b> |              |           |          |        |    |         |
| cg10760240                                           | NM_012138    | AATF      | 344.873  | 0.241  | 17 |         |
| <b>cg01491428</b>                                    | NM_001089    | ABCA3     | 344.873  | 0.294  | 16 | Island  |
| <b>cg03108651</b>                                    | NR_024514    | ADAMTS13  | 135.693  | 0.205  | 9  | N_Shore |
| <b>cg18662228</b>                                    | NM_014914    | AGAP1     | 97.199   | 0.208  | 2  | Island  |
| <b>cg04073914</b>                                    | NM_032717    | AGPAT9    | 100.245  | 0.212  | 4  | S_Shelf |
| <b>cg09998151</b>                                    | NM_004274    | AKAP6     | 344.873  | 0.285  | 14 |         |
| <b>cg05890457</b>                                    | NM_014629    | ARHGEF10  | 344.873  | 0.356  | 8  |         |
| <b>cg17056069</b>                                    | NM_001135191 | ASAP2     | 344.873  | 0.257  | 2  |         |
| <b>cg00095677</b>                                    | NM_174954    | ATP2A3    | 344.873  | 0.257  | 17 |         |
| <b>cg00713204</b>                                    | NM_017869    | BANP      | 344.873  | 0.313  | 16 | N_Shore |
| <b>cg10610477</b>                                    | NM_022893    | BCL11A    | 344.873  | 0.219  | 2  |         |
| <b>cg14655569</b>                                    | NM_015250    | BICD2     | 344.873  | 0.296  | 9  | N_Shelf |
| <b>cg21782309</b>                                    | NM_003957    | BRSK2     | 344.873  | 0.204  | 11 | S_Shore |
| <b>cg00231519</b>                                    | NM_153810    | C10orf46  | 135.693  | 0.235  | 10 | S_Shore |
| <b>cg08584759</b>                                    | NM_153256    | C10orf47  | 344.873  | 0.244  | 10 | Island  |
| <b>cg24694947</b>                                    | NM_152324    | C13orf16  | 344.873  | 0.210  | 13 | S_Shelf |
| <b>cg18075755</b>                                    | NM_031911    | C1QTNF7   | 106.825  | 0.209  | 4  |         |
| <b>cg14560110</b>                                    | NM_001004306 | CCDC144NL | 107.759  | 0.203  | 17 | Island  |
| <b>cg05638648</b>                                    | NM_130444    | COL18A1   | 344.873  | 0.218  | 21 | S_Shelf |
| <b>cg19218082</b>                                    | NM_001846    | COL4A2    | 96.815   | 0.204  | 13 | S_Shore |
| <b>cg17713488</b>                                    | NM_015719    | COL5A3    | 96.890   | 0.203  | 19 | S_Shore |
| <b>cg23813394</b>                                    | NM_004369    | COL6A3    | 344.873  | 0.292  | 2  |         |
| <b>cg16471877</b>                                    | NM_017421    | COQ3      | 344.873  | 0.260  | 6  |         |
| <b>cg11128983</b>                                    | NM_001008220 | CPLX2     | 344.873  | 0.223  | 5  | N_Shore |
| <b>cg00861214</b>                                    | NM_175710    | CR1L      | 344.873  | 0.283  | 1  |         |
| <b>cg11229715</b>                                    | NM_003590    | CUL3      | 117.597  | 0.227  | 2  |         |
| <b>cg08002427</b>                                    | NM_001372    | DNAH9     | 344.873  | 0.260  | 17 | S_Shore |
| <b>cg26893861</b>                                    | NM_004090    | DUSP3     | 118.828  | 0.218  | 17 |         |
| <b>cg05130642</b>                                    | NM_031308    | EPPK1     | 344.873  | 0.204  | 8  | Island  |
| <b>cg04212500</b>                                    | NM_005702    | ERAL1     | 344.873  | 0.264  | 17 | S_Shelf |
| <b>cg00156497</b>                                    | NM_172105    | EYA4      | 96.001   | 0.205  | 6  |         |
| <b>cg05990366</b>                                    | NM_181709    | FAM101A   | 344.873  | 0.249  | 12 |         |
| <b>cg26296371</b>                                    | NM_006567    | FARS2     | 113.547  | 0.215  | 6  |         |
| <b>cg09438069</b>                                    | NM_005245    | FAT1      | 344.873  | 0.263  | 4  |         |

|                   |              |           |         |       |    |         |
|-------------------|--------------|-----------|---------|-------|----|---------|
| <b>cg04888234</b> | NM_032738    | FCRLA     | 111.597 | 0.220 | 1  |         |
| <b>cg16140565</b> | NM_001166243 | FHIT      | 344.873 | 0.292 | 3  |         |
| <b>cg01801090</b> | NR_029435    | FLJ31306  | 344.873 | 0.283 | 14 | N_Shelf |
| <b>cg25203245</b> | NM_152432    | FLJ32810  | 344.873 | 0.339 | 11 |         |
| <b>cg10058204</b> | NR_026835    | FLJ37201  | 344.873 | 0.289 | 10 |         |
| <b>cg16464924</b> | NM_001079804 | GAA       | 91.925  | 0.205 | 17 | Island  |
| <b>cg00675157</b> | NM_000807    | GABRA2    | 344.873 | 0.242 | 4  |         |
| <b>cg01055691</b> | NM_002045    | GAP43     | 129.799 | 0.236 | 3  | N_Shore |
| <b>cg03812172</b> | NM_033508    | GCK       | 135.693 | 0.232 | 7  | N_Shore |
| <b>cg02891314</b> | NM_005110    | GFPT2     | 344.873 | 0.249 | 5  | Island  |
| <b>cg13944838</b> | NM_005110    | GFPT2     | 344.873 | 0.281 | 5  | Island  |
| <b>cg23221052</b> | NM_005110    | GFPT2     | 344.873 | 0.250 | 5  | Island  |
| <b>cg23248424</b> | NM_005110    | GFPT2     | 128.086 | 0.232 | 5  | Island  |
| <b>cg03088219</b> | NM_201591    | GPM6A     | 344.873 | 0.335 | 4  |         |
| <b>cg16908938</b> | NM_148903    | GREB1     | 115.731 | 0.218 | 2  |         |
| <b>cg11141652</b> | NR_003081    | GSTTP1    | 344.873 | 0.265 | 22 |         |
| <b>cg15242686</b> | NR_003081    | GSTTP1    | 344.873 | 0.249 | 22 |         |
| <b>cg22666875</b> | NR_003081    | GSTTP1    | 344.873 | 0.259 | 22 |         |
| <b>cg01500431</b> | NR_003082    | GSTTP2    | 344.873 | 0.207 | 22 | S_Shelf |
| <b>cg15070894</b> | NR_001317    | HCG4P6    | 118.171 | 0.218 | 6  | Island  |
| <b>cg25644740</b> | NR_001317    | HCG4P6    | 344.873 | 0.273 | 6  | Island  |
| <b>cg08506353</b> | NR_001435    | HLA-DPB2  | 344.873 | 0.242 | 6  |         |
| <b>cg09510698</b> | NR_001435    | HLA-DPB2  | 344.873 | 0.301 | 6  |         |
| <b>cg15019001</b> | NR_001435    | HLA-DPB2  | 344.873 | 0.255 | 6  |         |
| <b>cg09411910</b> | NM_002122    | HLA-DQA1  | 122.379 | 0.223 | 6  |         |
| <b>cg11784298</b> | NM_002122    | HLA-DQA1  | 111.758 | 0.223 | 6  |         |
| <b>cg22933800</b> | NM_002122    | HLA-DQA1  | 344.873 | 0.249 | 6  |         |
| <b>cg24470466</b> | NM_002122    | HLA-DQA1  | 344.873 | 0.465 | 6  |         |
| <b>cg14323910</b> | NM_002123    | HLA-DQB18 | 90.084  | 0.203 | 6  | N_Shelf |
| <b>cg13910785</b> | NM_002124    | HLA-DRB1* | 344.873 | 0.387 | 6  | N_Shelf |
| <b>cg21810411</b> | NM_002124    | HLA-DRB1* | 128.858 | 0.232 | 6  | N_Shelf |
| <b>cg24760581</b> | NM_002124    | HLA-DRB1* | 344.873 | 0.251 | 6  |         |
| <b>cg01341801</b> | NM_002125    | HLA-DRB5  | 344.873 | 0.348 | 6  | N_Shore |
| <b>cg17369694</b> | NM_002125    | HLA-DRB5  | 344.873 | 0.269 | 6  |         |
| <b>cg23365293</b> | NM_002125    | HLA-DRB5  | 96.995  | 0.206 | 6  | Island  |
| <b>cg26981746</b> | NM_002125    | HLA-DRB5  | 113.346 | 0.224 | 6  | Island  |
| <b>cg27362989</b> | NM_002125    | HLA-DRB5  | 120.241 | 0.229 | 6  | S_Shelf |
| <b>cg11752699</b> | NR_001298    | HLA-DRB6  | 124.798 | 0.226 | 6  |         |
| <b>cg19774683</b> | NR_001298    | HLA-DRB6  | 344.873 | 0.377 | 6  |         |
| <b>cg22627029</b> | NR_001298    | HLA-DRB6  | 344.873 | 0.234 | 6  |         |

|                   |              |           |         |       |    |         |
|-------------------|--------------|-----------|---------|-------|----|---------|
| <b>cg25140213</b> | NR_001298    | HLA-DRB6  | 344.873 | 0.278 | 6  |         |
| <b>cg02772880</b> | NM_017558    | HYDIN     | 122.765 | 0.230 | 16 | N_Shelf |
| <b>cg25790212</b> | NM_014987    | IGSF9B    | 344.873 | 0.249 | 11 | Island  |
| <b>cg18689402</b> | NM_002222    | ITPR1     | 344.873 | 0.203 | 3  |         |
| <b>cg03796003</b> | NM_018992    | KCTD5     | 344.873 | 0.465 | 16 | Island  |
| <b>cg26749518</b> | NM_012315    | KLK9      | 128.086 | 0.228 | 19 | Island  |
| <b>cg00729708</b> | NM_178842    | LASS3     | 132.753 | 0.238 | 15 | Island  |
| <b>cg06679270</b> | NM_178842    | LASS3     | 344.873 | 0.248 | 15 | Island  |
| <b>cg11008123</b> | NR_015451    | LOC283267 | 344.873 | 0.355 | 11 |         |
| <b>cg16503053</b> | NM_015116    | LRCH1     | 344.873 | 0.223 | 13 |         |
| <b>cg25450321</b> | NM_024652    | LRRK1*    | 344.873 | 0.315 | 15 | N_Shelf |
| <b>cg06950937</b> | NM_003550    | MAD1L1    | 344.873 | 0.214 | 7  | Island  |
| <b>cg13275129</b> | NM_032427    | MAML2     | 344.873 | 0.238 | 11 |         |
| <b>cg02228913</b> | NM_016835    | MAPT      | 344.873 | 0.281 | 17 | N_Shelf |
| <b>cg24801230</b> | NM_001123067 | MAPT      | 344.873 | 0.310 | 17 | S_Shelf |
| <b>cg00993903</b> | NM_001128919 | MARK3     | 344.873 | 0.270 | 14 |         |
| <b>cg06738063</b> | NM_001040000 | MLLT4     | 344.873 | 0.244 | 6  |         |
| <b>cg21209485</b> | NM_033467    | MMEL1     | 344.873 | 0.334 | 1  | S_Shore |
| <b>cg04627110</b> | NM_206813    | MOG       | 344.873 | 0.336 | 6  |         |
| <b>cg12279734</b> | NM_006792    | MORF4     | 344.873 | 0.263 | 4  |         |
| <b>cg25755428</b> | NM_001031727 | MRI1      | 344.873 | 0.284 | 19 | Island  |
| <b>cg06112835</b> | NM_181514    | MRPL21    | 111.670 | 0.223 | 11 |         |
| <b>cg01552920</b> | NM_001145113 | MYADML2   | 344.873 | 0.276 | 17 |         |
| <b>cg00501169</b> | NM_001143989 | NBPF4     | 344.873 | 0.213 | 1  |         |
| <b>cg16919708</b> | NM_001012393 | OPCML     | 129.799 | 0.238 | 11 |         |
| <b>cg18346634</b> | NM_000911    | OPRD1     | 344.873 | 0.277 | 1  | S_Shore |
| <b>cg02246922</b> | NM_030959    | OR12D3*   | 92.697  | 0.206 | 6  |         |
| <b>cg10701801</b> | NM_148909    | OSBPL9    | 112.772 | 0.216 | 1  |         |
| <b>cg22026089</b> | NM_013377    | PDZRN4    | 104.563 | 0.217 | 12 |         |
| <b>cg22466012</b> | NM_001130081 | PLD1      | 344.873 | 0.261 | 3  |         |
| <b>cg25465065</b> | NM_007221    | PMF1      | 98.700  | 0.211 | 1  |         |
| <b>cg08600378</b> | NM_001105577 | PRHOXNB   | 344.873 | 0.299 | 13 |         |
| <b>cg14001750</b> | NM_002737    | PRKCA     | 135.693 | 0.235 | 17 | S_Shelf |
| <b>cg02978201</b> | NM_002761    | PRM1      | 344.873 | 0.247 | 16 |         |
| <b>cg24073023</b> | NM_001042359 | PTPN20B   | 115.053 | 0.222 | 10 |         |
| <b>cg02901522</b> | NR_003367    | PVT1      | 344.873 | 0.289 | 8  |         |
| <b>cg12532878</b> | NM_007368    | RASA3     | 344.873 | 0.250 | 13 | N_Shore |
| <b>cg03570263</b> | NM_170769    | RNF39     | 128.086 | 0.230 | 6  | S_Shore |
| <b>cg08900396</b> | NM_006987    | RPH3AL    | 344.873 | 0.203 | 17 | N_Shelf |
| <b>cg08477332</b> | NM_020672    | S100A14   | 96.961  | 0.206 | 1  |         |

|                   |              |          |         |       |    |         |
|-------------------|--------------|----------|---------|-------|----|---------|
| <b>cg07249765</b> | NR_027816    | SDK1     | 110.376 | 0.209 | 7  |         |
| <b>cg13251750</b> | NM_175739    | SERPINA9 | 92.156  | 0.204 | 14 |         |
| <b>cg19223824</b> | NM_020708    | SLC12A5  | 344.873 | 0.316 | 20 | N_Shelf |
| <b>cg07664579</b> | NM_001044    | SLC6A3   | 111.850 | 0.223 | 5  | S_Shelf |
| <b>cg17662493</b> | NM_148674    | SMC1B    | 344.873 | 0.289 | 22 | N_Shelf |
| <b>cg09289202</b> | NM_006374    | STK25    | 94.263  | 0.201 | 2  | N_Shelf |
| <b>cg14422932</b> | NM_018401    | STK32B   | 344.873 | 0.229 | 4  |         |
| <b>cg16112880</b> | NM_016456    | TMEM9    | 344.873 | 0.249 | 1  | Island  |
| <b>cg00872984</b> | NM_019105    | TNXB     | 135.693 | 0.244 | 6  | Island  |
| <b>cg07524919</b> | NM_019105    | TNXB     | 107.351 | 0.218 | 6  | Island  |
| <b>cg14188106</b> | NM_019105    | TNXB     | 109.641 | 0.221 | 6  | Island  |
| <b>cg26365090</b> | NM_001098796 | TOX2     | 344.873 | 0.265 | 20 |         |
| <b>cg02627240</b> | NM_022445    | TPK1     | 344.873 | 0.263 | 7  |         |
| <b>cg03187614</b> | NM_006778    | TRIM10   | 344.873 | 0.397 | 6  |         |
| <b>cg13446859</b> | NM_007028    | TRIM31   | 111.459 | 0.217 | 6  |         |
| <b>cg25569462</b> | NM_173553    | TRIML2   | 118.671 | 0.226 | 4  | N_Shore |
| <b>cg01891583</b> | NM_003470    | USP7     | 118.450 | 0.228 | 16 |         |
| <b>cg15365500</b> | NM_005715    | UST      | 344.873 | 0.270 | 6  |         |
| <b>cg13564529</b> | NM_001134398 | VAV2*    | 344.873 | 0.426 | 9  |         |
| <b>cg07456585</b> | NM_182894    | VSX2     | 344.873 | 0.260 | 14 | N_Shore |
| <b>cg19471911</b> | NM_001130145 | YAP1     | 344.873 | 0.250 | 11 |         |
| <b>cg07878625</b> | NR_015357    | ZNF783   | 344.873 | 0.229 | 7  | N_Shore |

**Supplementary Table 4. Differentially methylated autosomal genes that co-varied in brain and blood DNA from PD patients, complete list.** Analysis of differential methylation was performed with Genome Studio using Illumina custom model. Genes with Delta Beta value  $> |0.20|$  at  $p < 0.01$  and FDR  $q < 0.001$ . \* Denotes genes for which more than one DM independent probe was detected showing opposite methylation changes.

| GENE NAME                                     | Delta Beta Brain | Delta Beta Blood |
|-----------------------------------------------|------------------|------------------|
| <b>Genes with increased methylation in PD</b> |                  |                  |
| KCTD5                                         | 0.429            | 0.465            |
| LOC283267                                     | 0.375            | 0.355            |
| VAV2                                          | 0.374            | 0.426            |
| MOG                                           | 0.357            | 0.336            |
| TRIM10                                        | 0.352            | 0.397            |
| PRHOXNB                                       | 0.340            | 0.299            |
| HLA-DQA1                                      | 0.325            | 0.290            |
| ARHGEF10                                      | 0.319            | 0.356            |
| FLJ32810                                      | 0.316            | 0.339            |
| LRRK1*                                        | 0.294            | 0.315            |
| GFPT2                                         | 0.291            | 0.253            |
| SLC12A5                                       | 0.284            | 0.316            |
| MMEL1*                                        | 0.284            | 0.334            |
| HLA-DRB5                                      | 0.282            | 0.255            |
| TMEM9                                         | 0.274            | 0.249            |
| SMC1B                                         | 0.273            | 0.289            |
| HLA-DPB2                                      | 0.272            | 0.266            |
| UST                                           | 0.272            | 0.270            |
| BICD2                                         | 0.266            | 0.296            |
| ABCA3                                         | 0.264            | 0.294            |
| OPRD1                                         | 0.263            | 0.277            |
| MRI1                                          | 0.258            | 0.284            |
| FLJ37201                                      | 0.254            | 0.289            |
| FHIT                                          | 0.254            | 0.292            |
| BANP                                          | 0.254            | 0.313            |
| MAPT                                          | 0.247            | 0.295            |
| CR1L                                          | 0.244            | 0.283            |
| PVT1                                          | 0.241            | 0.289            |
| HLA-DRB6                                      | 0.240            | 0.279            |



|                                               |        |        |
|-----------------------------------------------|--------|--------|
| VSX2                                          | 0.240  | 0.260  |
| FLJ31306                                      | 0.240  | 0.283  |
| TPK1                                          | 0.239  | 0.263  |
| ERAL1                                         | 0.237  | 0.264  |
| COL6A3                                        | 0.236  | 0.292  |
| ATP2A3                                        | 0.235  | 0.257  |
| ASAP2                                         | 0.235  | 0.257  |
| TOX2                                          | 0.232  | 0.265  |
| LASS3                                         | 0.230  | 0.243  |
| MORF4                                         | 0.226  | 0.263  |
| AATF                                          | 0.224  | 0.241  |
| HLA-DQB1                                      | 0.223  | 0.203  |
| GCK                                           | 0.223  | 0.232  |
| C10orf46                                      | 0.223  | 0.235  |
| PRM1                                          | 0.222  | 0.247  |
| GSTTP2                                        | 0.222  | 0.207  |
| DNAH9                                         | 0.220  | 0.260  |
| COQ3                                          | 0.219  | 0.260  |
| RNF39                                         | 0.218  | 0.230  |
| GSTTP1                                        | 0.218  | 0.258  |
| AKAP6                                         | 0.216  | 0.285  |
| FAT1                                          | 0.214  | 0.263  |
| OSBPL9                                        | 0.213  | 0.216  |
| ZNF783                                        | 0.213  | 0.229  |
| FCRLA                                         | 0.210  | 0.220  |
| CUL3                                          | 0.209  | 0.227  |
| TRIML2                                        | 0.208  | 0.226  |
| YAP1                                          | 0.206  | 0.250  |
| RASA3                                         | 0.206  | 0.250  |
| ITPR1                                         | 0.205  | 0.203  |
| MAML2                                         | 0.204  | 0.238  |
| USP7                                          | 0.201  | 0.228  |
| SERPINA9                                      | 0.201  | 0.204  |
| CPLX2                                         | 0.200  | 0.223  |
| <b>Genes with decreased methylation in PD</b> |        |        |
| DNAJA3                                        | -0.445 | -0.511 |
| JAKMIP3                                       | -0.403 | -0.362 |
| FRK                                           | -0.386 | -0.341 |
| LRRC27                                        | -0.382 | -0.406 |
| DMBX1                                         | -0.370 | -0.354 |

|              |        |        |
|--------------|--------|--------|
| LGALS7       | -0.368 | -0.380 |
| STEAP3       | -0.358 | -0.296 |
| OPRM1        | -0.318 | -0.278 |
| CAPN8        | -0.318 | -0.305 |
| LOC391322    | -0.317 | -0.264 |
| FOXK1        | -0.317 | -0.340 |
| APBA1        | -0.312 | -0.283 |
| DCUN1D2      | -0.307 | -0.305 |
| MAGI2        | -0.306 | -0.228 |
| ARHGEF12     | -0.301 | -0.300 |
| HLA-DRB1*    | -0.296 | -0.294 |
| OR12D3       | -0.280 | -0.275 |
| ZNF117       | -0.273 | -0.305 |
| CTNNA2       | -0.270 | -0.234 |
| KIAA0513     | -0.259 | -0.283 |
| STT3A        | -0.258 | -0.261 |
| CNTNAP2      | -0.256 | -0.261 |
| DSE          | -0.255 | -0.259 |
| KCNH1        | -0.254 | -0.267 |
| SLC25A24     | -0.253 | -0.241 |
| TSPAN9       | -0.253 | -0.330 |
| CPAMD8       | -0.252 | -0.245 |
| NPHP4        | -0.245 | -0.251 |
| ATP8A2       | -0.244 | -0.221 |
| LOC100292680 | -0.244 | -0.288 |
| AMZ1         | -0.241 | -0.253 |
| GSTT1        | -0.239 | -0.239 |
| PCSK9        | -0.238 | -0.230 |
| BANF2        | -0.236 | -0.291 |
| SH3PXD2A     | -0.236 | -0.208 |
| XAB2         | -0.234 | -0.230 |
| ANXA2        | -0.234 | -0.244 |
| FAM132A      | -0.232 | -0.207 |
| PYROXD1      | -0.232 | -0.283 |
| TNFSF8       | -0.230 | -0.221 |
| NDUFA10      | -0.229 | -0.222 |
| PIK3R2       | -0.229 | -0.223 |
| MYOM2        | -0.228 | -0.201 |
| HLA-G        | -0.227 | -0.220 |
| MMEL1*       | -0.226 | -0.220 |

|                |        |               |
|----------------|--------|---------------|
| <b>COL11A2</b> | -0.224 | <b>-0.209</b> |
| <b>NTM</b>     | -0.223 | <b>-0.219</b> |
| <b>SMOC2</b>   | -0.222 | <b>-0.246</b> |
| <b>PWWP2B</b>  | -0.222 | <b>-0.271</b> |
| <b>MRPL3</b>   | -0.221 | <b>-0.214</b> |
| <b>GZMM</b>    | -0.220 | <b>-0.233</b> |
| <b>WDR27</b>   | -0.219 | <b>-0.225</b> |
| <b>OR10K1</b>  | -0.219 | <b>-0.232</b> |
| <b>SPATS2L</b> | -0.217 | <b>-0.264</b> |
| <b>LRRK1*</b>  | -0.216 | <b>-0.305</b> |
| <b>MCC</b>     | -0.216 | <b>-0.209</b> |
| <b>MIR886</b>  | -0.214 | <b>-0.242</b> |
| <b>TUBA3E</b>  | -0.210 | <b>-0.210</b> |
| <b>TRIM27</b>  | -0.210 | <b>-0.217</b> |
| <b>SMYD3</b>   | -0.208 | <b>-0.267</b> |
| <b>TMCO3</b>   | -0.207 | <b>-0.203</b> |
| <b>MAPK10</b>  | -0.201 | <b>-0.201</b> |

## Supplementary Figure 1. Bootstrap analysis of differentially methylated probes

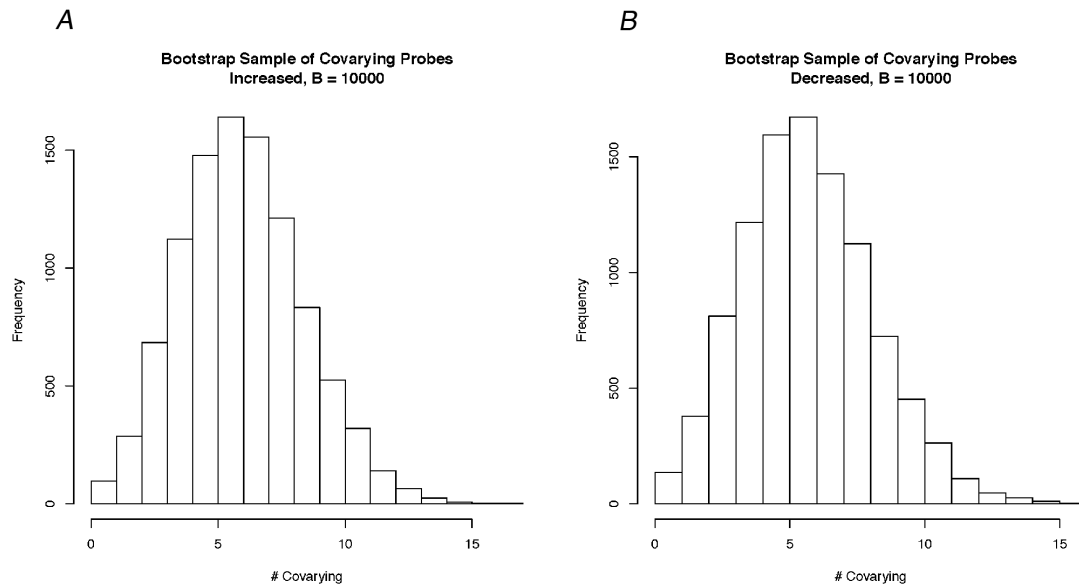

We detected 2,908 probes in brain and 3,897 probes in PBLs showing differential methylation in PD samples. The majority of these probes showed decreased methylation in PD: 2,591 in the brain and 3,421 in blood. The remaining DM probes gained methylation, 317 probes in the brain and 476 in PBLs (Table 1). Stepwise selection of probes located only on autosomal chromosomes yielded 131 probes gaining methylation in brain and 206 in blood in PD, while 148 probes lost methylation in brain and 174 in blood. From these pool of differentially methylated autosomal probes, a total of N=124 probes associated with annotated genes (63 with increased and 61 with decreased methylation) showed concordant methylation changes in both tissues (brain and blood).

We tested the probability of selecting the same 124 probes from both pools of differentially methylated probes in PD brain and blood only by chance by performing bootstrap analysis<sup>1</sup>. We independently analyzed probes sets with increased (A) and decreased (B) methylation in PD. We generated a random sample from the 131 probes with increased methylation in brain and from the 206 that gained methylation in PD blood, and computed how many probes were present on both sets. The procedure was repeated 10,000 times. For the 10,000 iterations, most of the bootstrapped samples had a low number of co-varying probes, with N=6 being the value that reached the highest frequency (P<0.001). Similar results were obtained when the same procedure was performed for the group of 148 probes showing decreased methylation in brain and 174 probes that lost methylation in PD blood, and testing for the probability of finding the same 61 probes in both sets. The results obtained from bootstrap analysis preclude the possibility that we could select the same 124 probes by chance.

1. Efron, B. and Tibshirani, R. (1993) An Introduction to the Bootstrap. Chapman and Hall, New York, London.

**Supplementary Figure 2. Validation of array findings by methylation-sensitive restriction/qPCR technique.** Methylation levels of 5 selected genes showing increased (*MRI1* and *TMEM9*) or decreased methylation (*GSST1*, *TUBA3E* and *KCNH1*) on the array analysis was also determined by a qPCR-based method in brain and blood samples from PD patients (n=5) and control subjects (n=6) as an independent validation assay. Significant differences in methylation levels were determined in brain or blood groups by Student's *t* test, two-tailed (\*  $p < 0.005$ ; \*\*  $p < 0.01$  and \*\*\* $p < 0.001$ ).

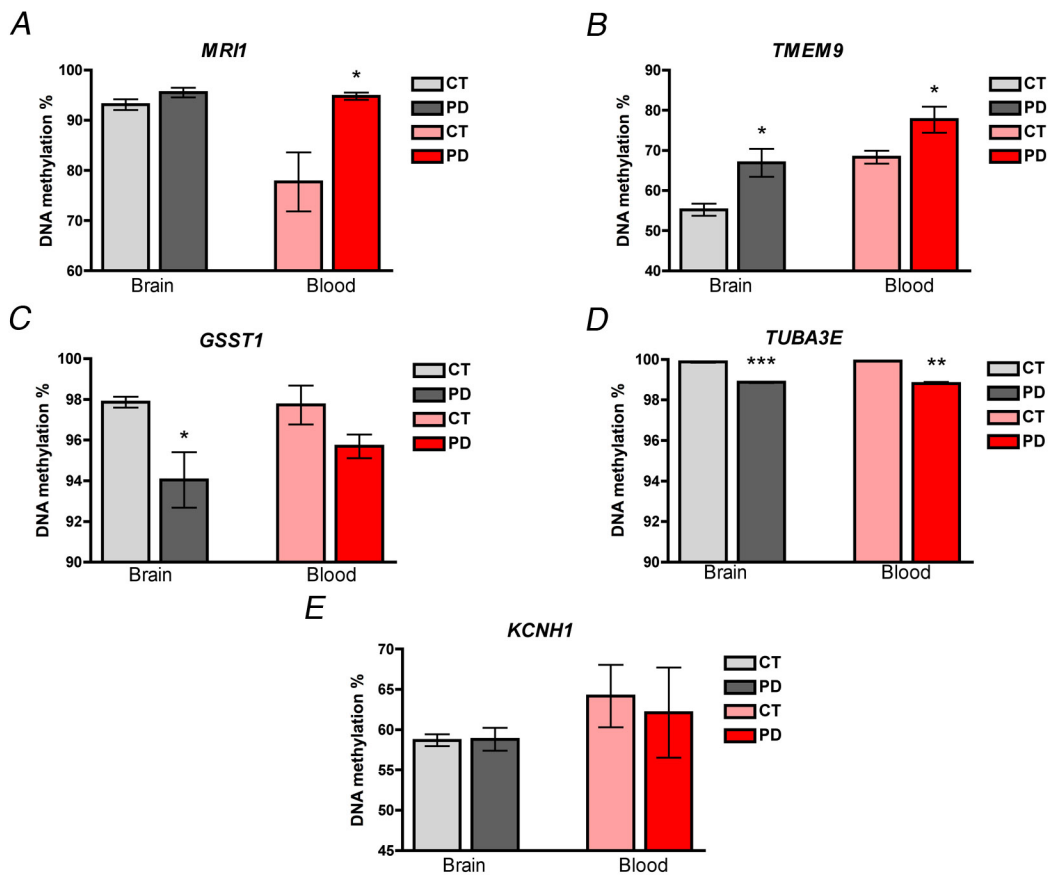

Supplement: epi-8-1030-s01.pdf [file epi-8-1030-s01.pdf]
